# Supplementary material for: Syntheses and properties of 11-ring-fused linear thienoacenes
Source: Royal Society of Chemistry journal article supplement (doi:10.1039/d3tc00408b), 2023-01-01
Supplement: d3tc00408b1.pdf [file d3tc00408b1.pdf]

## **Supporting Information**

# **Syntheses and Properties of 11-Ring-Fused Linear Thienoacenes**

### **Table of Contents**

- 1. Experiment and device fabrication**
- 2. Synthesis, NMR, and MS spectra**
- 3. Optical spectra**
- 4. DFT Calculation**
- 5. CV Curves**
- 6. Thermology Curves**
- 7. Single crystal structures**
- 8. OFET Characteristics**

## 1. Experiment and device fabrication

The energy level calculation method was used to determine the HOMO.

$$E_{HOMO} = -(E_{ox}^{onset} - Fc/Fc^+ + 4.8)$$

$$E_{LOMO} = E_g + E_{HOMO}$$

Unless otherwise noted, all reagents were obtained from commercial suppliers and were used without further purification. <sup>1</sup>H NMR (400 MHz) and <sup>13</sup>C NMR (100 MHz) spectra were obtained on Bruker 400 M nuclear resonance spectrometers. Chemical shifts are reported in ppm from tetramethylsilane with solvent resonance as the internal standard. The following abbreviations were used to designate chemical shift multiplicities: s = singlet, d = doublet, t = triplet, and m = multiplet. Flash column chromatography was performed using 200-300 mesh silica gel. To gain more insight into the frontier energy levels, density functional theory (DFT) calculations were performed on all the products using Gaussian 09 program with the 6-31G(d) basis set. The geometries of molecules at ground state were optimized with DFT at the m062x/6-31g(d) level using Gaussian program. In order to investigate the photophysical properties, the excited electronic structures of molecules were calculated at the PBE0/TZVP level with the time-dependent density functional theory (TD-DFT) method, and the excited energy and oscillator strength can also be obtained from the calculation result at the same time. The UV absorption spectroscopy were obtained by broaden the oscillator strength at corresponding excited energy using Multiwfn program.

OFET devices were fabricated in a BGBC configuration on Si/SiO<sub>2</sub> substrates with 50 nm thick gold electrodes. The SiO<sub>2</sub> dielectric layer was 300 nm thick. The source-drain electrodes were interdigitated with channel length varying from 2.5 to 40 μm and channel width varying from 0.1

to 1 mm. Substrates were cleaned softly with IPA and acetone, making sure that the prefabricated electrodes are not damaged. Then, OTMS treatment was performed on the substrates that were placed in an oven with OTMS at a temperature of 120 °C for 5 h. The glass crucibles were cleaned thoroughly in piranha solution (3:1 solution of sulfuric acid and hydrogen peroxide) to remove all organic residues and then washed with isopropyl alcohol and acetone. A chloroform solution of BBDTB-H (5 mg mL<sup>-1</sup>) was then deposited by spin-coating at 3000 rpm for 60s on the OTMS-treated substrate to form organic semiconducting layers.

## 2. Synthesis, <sup>1</sup>H-NMR, <sup>13</sup>C-NMR and MS spectra

The synthetic route of **DT-H** was reported in the literature.<sup>1</sup>

**Synthesis of compound 1.** Under N<sub>2</sub> condition, **DT-H** (1.4 g, 2.19 mmol), dissolved in 120 mL dry THF and cooled to 0°C, dropped *n*-BuLi (1.6 mL, 1.6M) in the system slowly. The mixture was brought to room temperature and stirred for 2 h. Then cooled to -78°C and dropped TIPSCl (0.95mL). After stirring at room temperature overnight, the reaction was extracted with DCM (50 mL) three times and the organic layer was washed with brine several times, and dried over anhydrous MgSO<sub>4</sub>. After the removal of solvent, the residue was purified by petroleum ether to get a yellow oil **1** (yield: 78%). <sup>1</sup>H NMR (400 MHz, CDCl<sub>3</sub>, δ, ppm), δ 7.56 (d, J=5.2Hz, 1H), 7.49 (s, 1H), 7.38 (d, J=5.3Hz, 1H), 3.25-3.18 (m, 4H), 1.21-1.19 (d, J=7.4Hz, 18H) ppm. MALDI-TOF MS: calculated for C<sub>47</sub>H<sub>74</sub>S<sub>4</sub>Si 794.4443, found 794.4402.

**Synthesis of compound 2.** Compound **1** (3.225 g, 0.004 mol) dissolved in 110 mL dry THF and kept the system under N<sub>2</sub> protection. Added NBS (1.084 g, 0.006 mol) at 0 °C, wrapped the flask with aluminum foil to avoid light, restored to room temperature slowly, and quenched by water after 12 h reaction. Extracted with DCM, washed with saturated sodium chloride solution, and

dried with anhydrous sodium sulfate. Used petroleum ether over the column. The product of this step is a yellow solid (yield: 90%).  $^1\text{H}$  NMR (400 MHz,  $\text{CDCl}_3$ ,  $\delta$ , ppm),  $\delta$  7.48 (s, 1H), 7.38 (s, 1H), 3.23-3.19 (t,  $J=7.4\text{Hz}$ , 2H), 3.12-3.08 (t,  $J=8.6\text{Hz}$ , 2H), 1.21-1.18 (d,  $J=7.4\text{Hz}$ , 18H) ppm.  $^{13}\text{C}$  NMR (101 MHz,  $\text{CDCl}_3$ )  $\delta$  140.39, 139.15, 137.70, 135.02, 134.65, 133.52, 131.96, 130.84, 130.56, 127.39, 122.71, 113.88, 53.40, 31.95, 31.18, 31.00, 30.36, 30.18, 29.77, 29.74, 29.72, 29.70, 29.61, 29.49, 29.39, 22.71, 18.64, 14.12, 11.87. MALDI-TOF MS: calculated for  $\text{C}_{47}\text{H}_{73}\text{BrS}_4\text{Si}$  872.3548, found 872.3537.

**Synthesis of compound 3. 2** (200 mg, 0.23 mmol) was dissolved in 30 mL anhydrous diethyl ether under  $\text{N}_2$  protection. The system was stirred at  $-78\text{ }^\circ\text{C}$  for 30 min and added LDA (0.13ml, 2M), stirred at  $-78\text{ }^\circ\text{C}$  for 30 min, then increased the temperature to  $0\text{ }^\circ\text{C}$ , stirred at  $0\text{ }^\circ\text{C}$  for 30 min, then cooled down to  $-78\text{ }^\circ\text{C}$ , added  $\text{CuCl}_2$  (123 mg, 0.91 mmol). After adding, moved to room temperature and stirred overnight. The mixture was extracted with DCM (50 mL) three times. After the combination, the organic layer was washed with brine several times and dried over anhydrous  $\text{MgSO}_4$ . After the removal of the solvent, the residue was purified by petroleum ether to get a yellow solid 3 (yield: 52%).  $^1\text{H}$  NMR (400 MHz,  $\text{CDCl}_3$ ,  $\delta$ , ppm),  $\delta$  7.46 (s, 2H), 3.24-3.20 (t,  $J=7.4\text{Hz}$ , 4H), 3.18-3.14 (t,  $J=7.4\text{Hz}$ , 4H), 1.77-1.71 (m, 4H), 1.67-1.62 (m, 4H), 1.46-1.41 (m, 6H), 1.20-1.18 (d,  $J=7.4\text{Hz}$ , 36H) ppm.  $^{13}\text{C}$  NMR (101 MHz,  $\text{CDCl}_3$ )  $\delta$  140.36, 139.68, 138.41, 138.14, 135.26, 134.44, 133.88, 132.26, 131.85, 131.26, 130.97, 130.54, 127.42, 105.29, 77.32, 77.00, 76.69, 31.96, 31.94, 30.30, 29.78, 29.75, 29.73, 29.71, 29.69, 29.62, 29.55, 29.39, 22.71, 18.65, 14.12, 11.88, MALDI-TOF MS: calculated for  $\text{C}_{94}\text{H}_{144}\text{BrS}_4\text{Si}_2$  1742.6939, found 1742.6873.

**Synthesis of BBDTB-TIPS.** Under  $\text{N}_2$  condition, **3** (500 mg, 0.286 mmol) didodecylboronic acid diester (1.06 g, 1.72 mmol), degassed  $\text{K}_2\text{CO}_3$  solution (2 M, 4 mL), degassed dry THF (100

mL) and Pd(PPh<sub>3</sub>)<sub>4</sub> (150mg, 0.13mmol) were filled in a two-neck flask and the mixture was stirred at 90 °C for 12 h. The mixture was cooled to room temperature and then concentrated under reduced pressure. Finally, the crude products were purified by column chromatography using petroleum ether to afford the principal product as a yellow solid **BBDTB-TIPS** (yield: 59%).<sup>1</sup>H NMR (400 MHz, CDCl<sub>3</sub>, δ, ppm), δ 7.52 (s, 2H), 3.27-3.19 (m, 12H), 1.22-1.20 (d, J=7.4Hz, 36H) ppm. <sup>13</sup>C NMR (151 MHz, CDCl<sub>3</sub>) δ 139.52, 137.63, 136.70, 133.85, 133.50, 132.97, 130.80, 130.61, 130.38, 130.30, 130.23, 129.56, 129.41, 129.30, 76.15, 75.94, 75.73, 31.00, 30.97, 30.96, 30.92, 29.44, 29.29, 29.13, 28.80, 28.78, 28.74, 28.47, 21.72, 17.67, 13.12, 10.92. MALDI-TOF MS: calculated for C<sub>120</sub>H<sub>194</sub>S<sub>8</sub>Si<sub>2</sub> 1947.2485, found 1947.2403. CCDC:2204238

By-product was obtained by column chromatography as a yellow solid **DT-DT** (yield: trace amount). <sup>1</sup>H NMR (400 MHz, CDCl<sub>3</sub>) δ 7.53 (s, 2H), 7.48 (s, 2H), 3.17 (m, 8H), 1.73(m, 8H), 1.67(m, 8H), 1.18(d, J=8.4Hz, 18H) ppm. <sup>13</sup>C NMR (151 MHz, CDCl<sub>3</sub>) δ 140.44, 139.63, 139.03, 137.70, 136.52, 135.16, 134.32, 133.75, 131.92, 131.06, 130.58, 127.41, 116.44, 31.95, 31.19, 30.38, 30.22, 29.79, 29.74, 29.71, 29.67, 29.62, 29.54, 29.42, 29.40, 22.71, 18.64, 14.14, 11.85. MALDI-TOF MS: calculated for C<sub>94</sub>H<sub>146</sub>S<sub>8</sub>Si<sub>2</sub> 1586.87 found 1586.9.

**Synthesis of BBDTB-H.** Under N<sub>2</sub> condition, **BBDTB-TIPS** (0.3 g, 6.32 mmol) was dissolved in 100 mL dry THF and put the system in the ice-water mixture for 30 min. At 0 °C, TBAF (0.3 mL, 1 mol/L) was slowly added dropwise to the system. After reacting at 0 °C for 30 min, removed the ice-water bath and stirred at room temperature for 24 h. Then added 10 mL of water to quench the reaction. and then concentrated under reduced pressure. Finally, the crude products were purified by column chromatography using petroleum ether to get a yellow solid **BBDTB-H** (yield: 82%).<sup>1</sup>H NMR (400 MHz), δ 7.45 (d, J=4.8Hz, 2H), 7.26 (d, J=5.1Hz, 2H), 3.25-3.21 (m, 8H), 3.11-3.08 (m, 4H) ppm. <sup>13</sup>C NMR (151 MHz, CDCl<sub>3</sub>) δ 136.02, 134.82, 134.37, 134.11, 133.99,

131.63, 131.36, 131.33, 131.31, 131.23, 130.67, 130.40, 127.85, 119.72, 77.22, 77.01, 76.79, 32.00, 31.98, 31.96, 29.88, 29.85, 29.82, 29.80, 29.75, 29.47, 29.43, 22.73, 22.70. MALDI-TOF MS: calculated for  $C_{102}H_{154}S_8$  1634.9816, found 1634.9841.

**Synthesis of BBDTB-Br.** Compound **BBDTB-H** (24 mg, 0.04 mmol) dissolved in 6 mL dry THF, keep the system under  $N_2$  protection, Added NBS (22 mg, 1.2 tendency for) at 0 °C, wrapped the flask with aluminum foil to avoid light, restored to room temperature slowly, quenched by water after 12 h reaction. Extracted with DCM, washed with saturated sodium chloride solution, and dried with anhydrous sodium sulfate. Used petroleum ether over the column. The product of this step is a yellow solid (yield: 50%).  $^1H$  NMR (400 MHz),  $\delta$  7.20 (s, 2H), 3.22-3.16 (m, 8H), 3.01-2.97 (m, 4H)ppm. MALDI-TOF MS: calculated for  $C_{102}H_{152}Br_2S_8$  1790.8026, found 1790.7958.

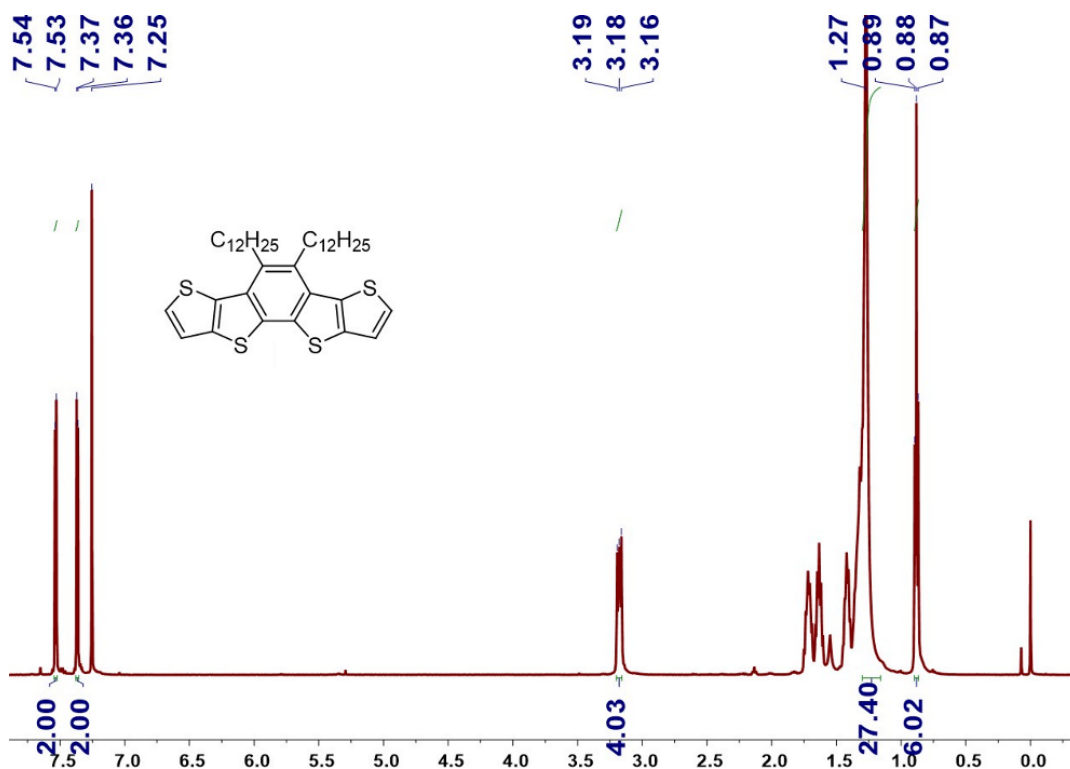

Figure S1. <sup>1</sup>H-NMR spectra of compound **DT-H**. (400 MHz, CDCl<sub>3</sub>, 298K)

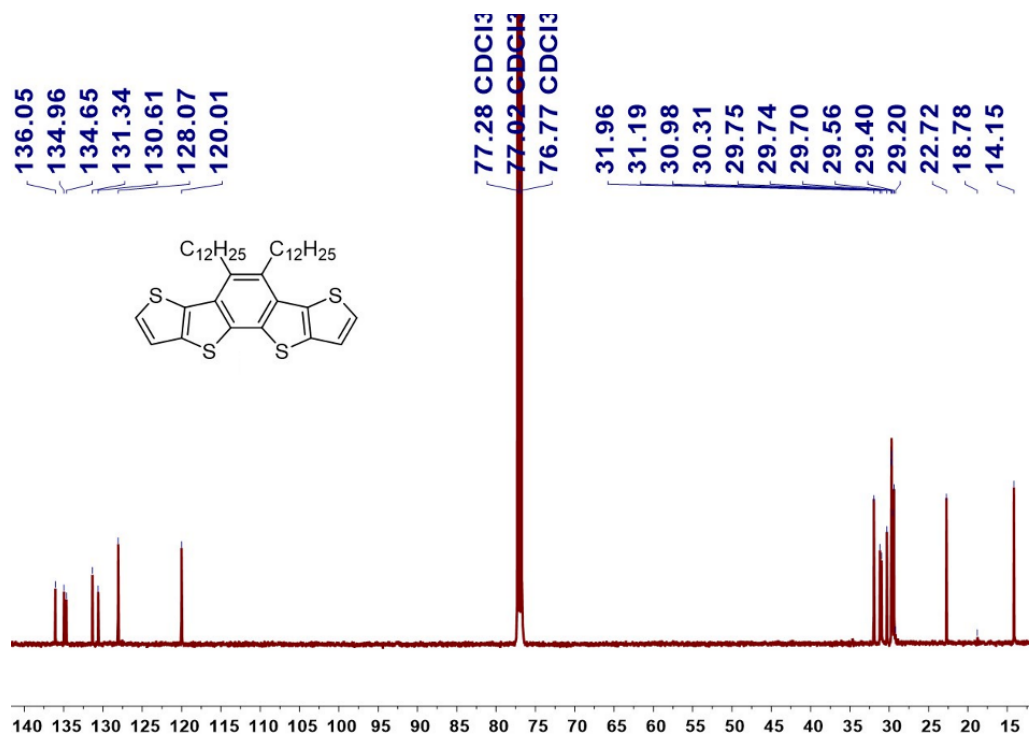

Figure S2. <sup>13</sup>C-NMR spectra of compound **DT-H**. (101 MHz, CDCl<sub>3</sub>, 298K)

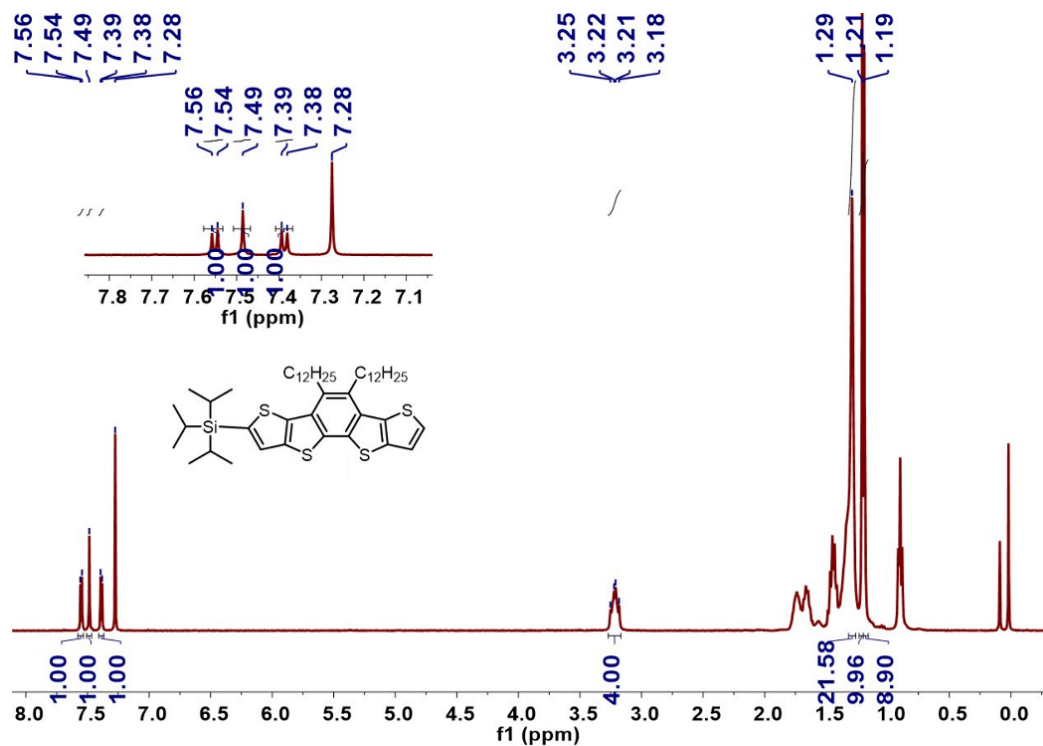

Figure S3.  $^1\text{H-NMR}$  spectra of compound **1**. (400 MHz,  $\text{CDCl}_3$ , 298K)

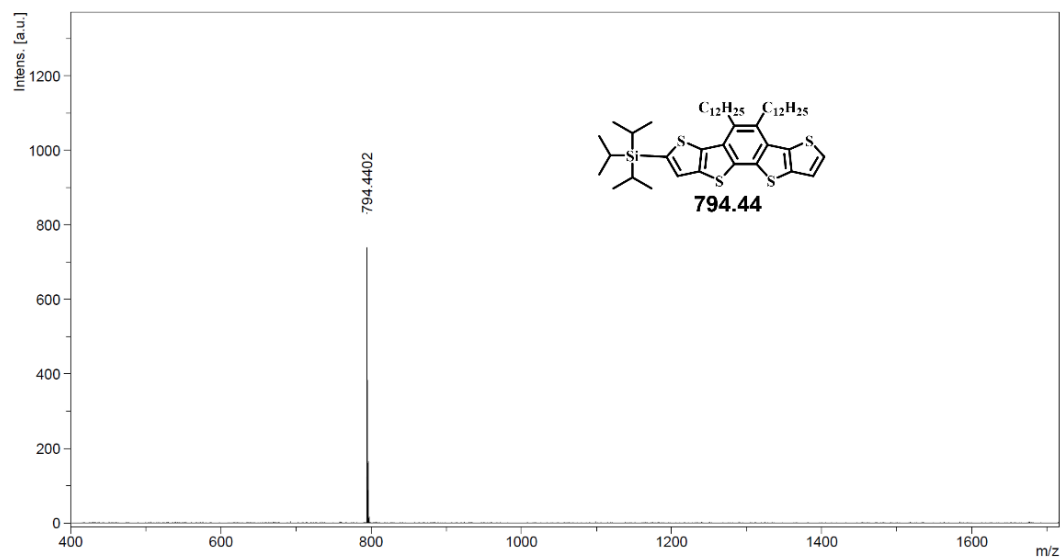

Figure S4. MALDI-TOF MS spectra of compound **1**.

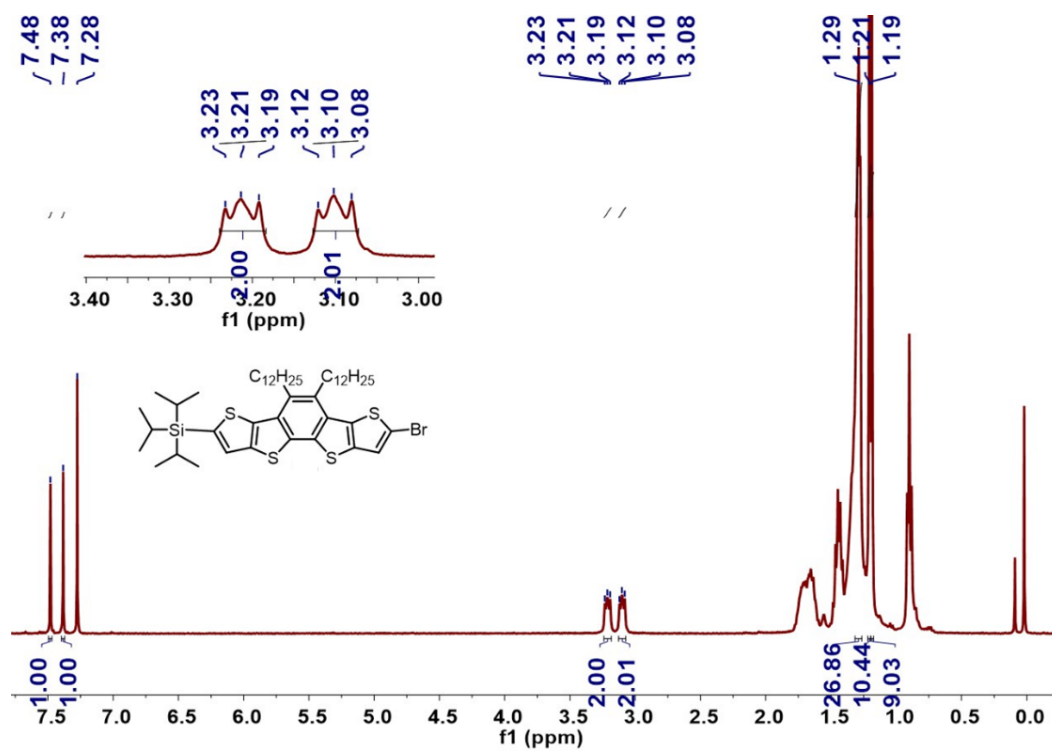

Figure S5  $^1\text{H-NMR}$  spectra of compound **2**. (400 MHz,  $\text{CDCl}_3$ , 298K)



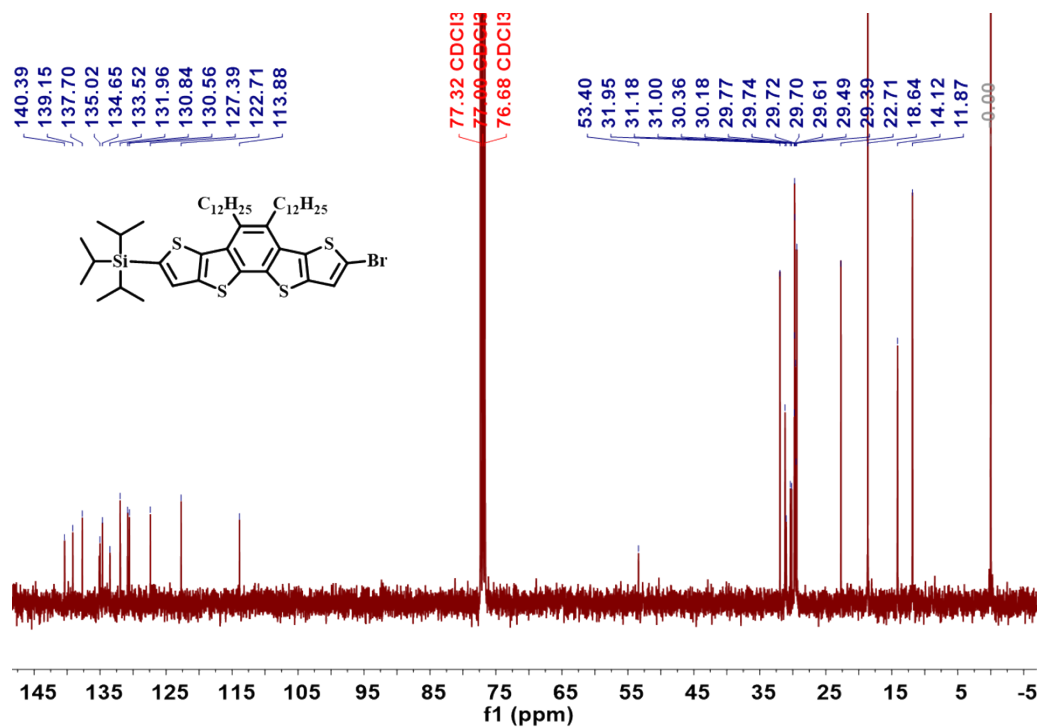

Figure S6. <sup>13</sup>C-NMR spectra of compound 2. (101 MHz, CDCl<sub>3</sub>, 298K)

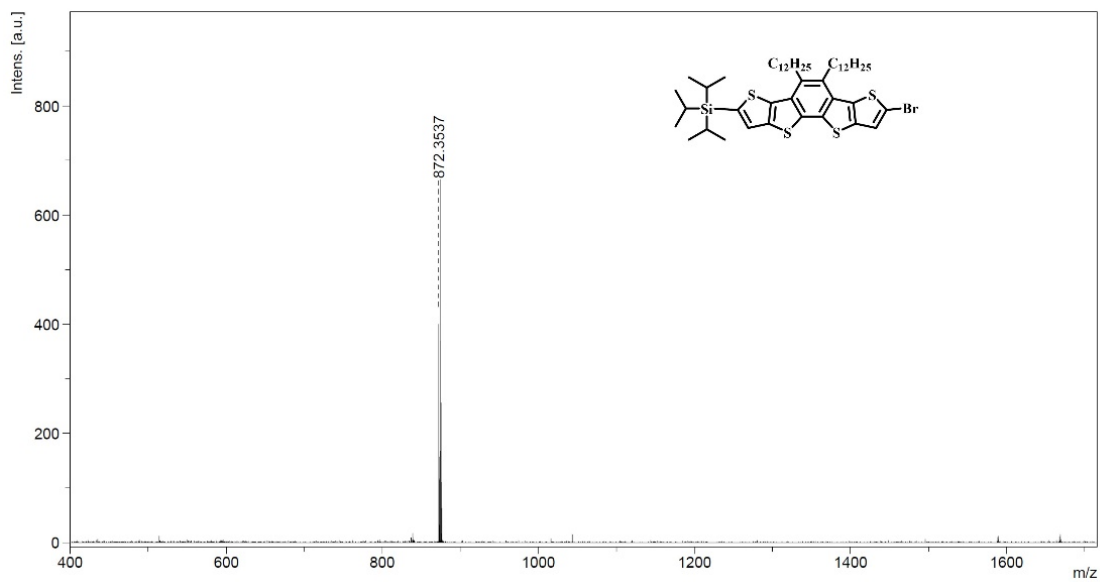

Figure S7. MALDI-TOF MS spectra of compound 2.

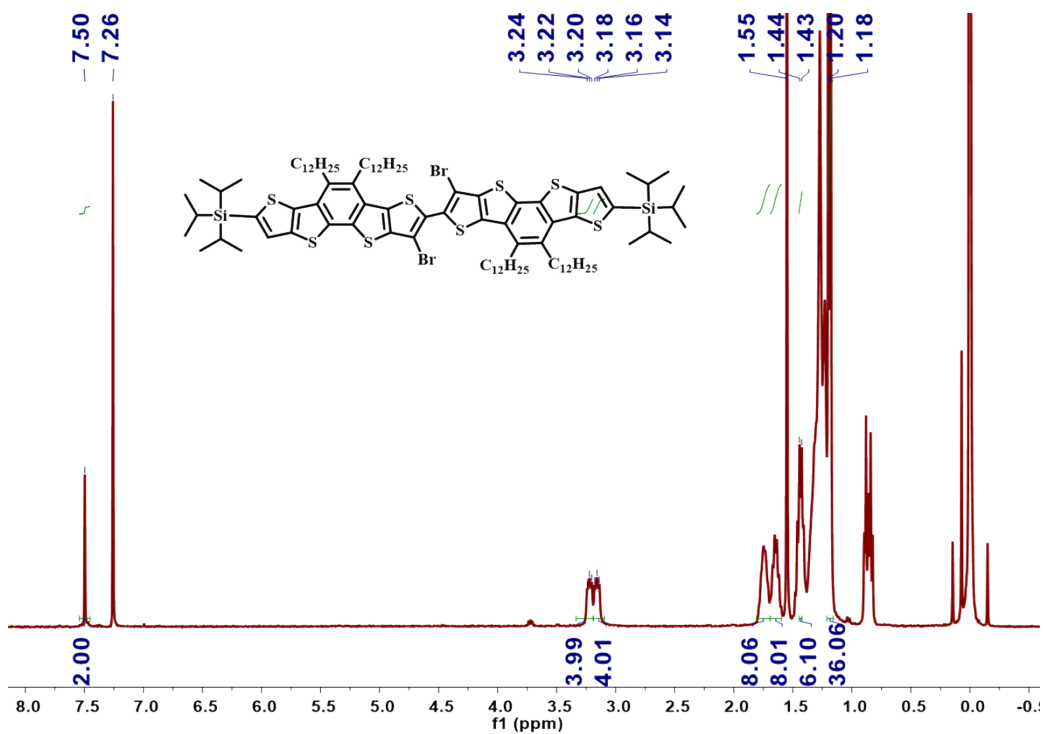

Figure S8.  $^1\text{H}$ -NMR spectra of compound 3. (400 MHz,  $\text{CDCl}_3$ , 298K)

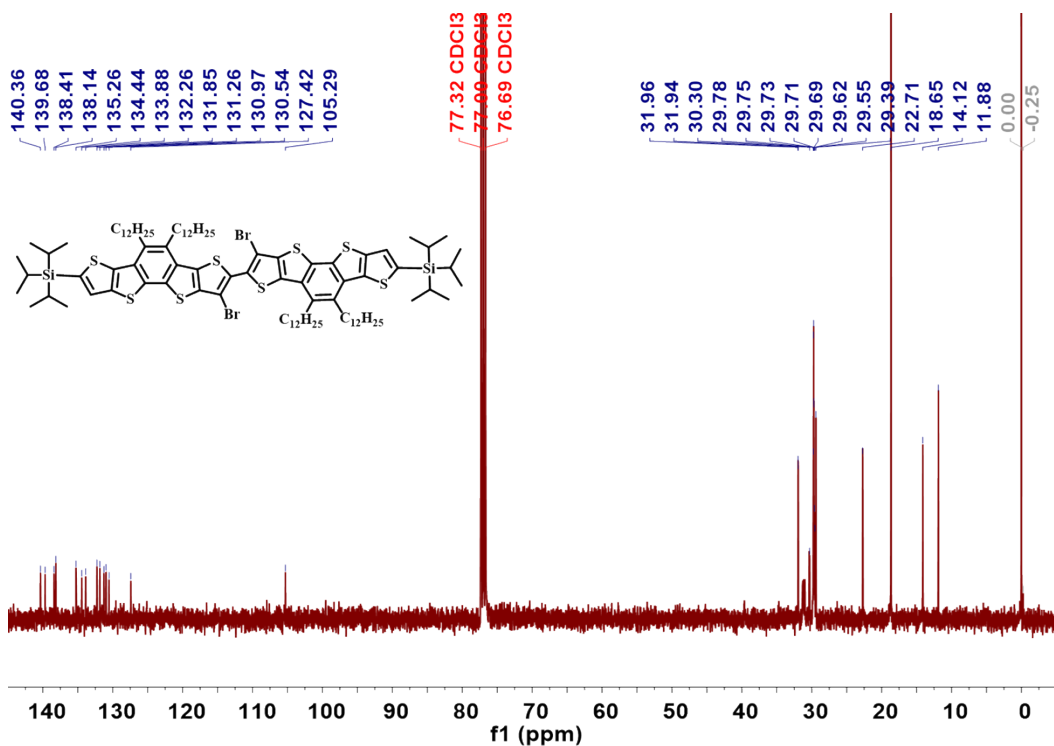

Figure S9.  $^{13}\text{C}$ -NMR spectra of compound 3. (101 MHz,  $\text{CDCl}_3$ , 298K)

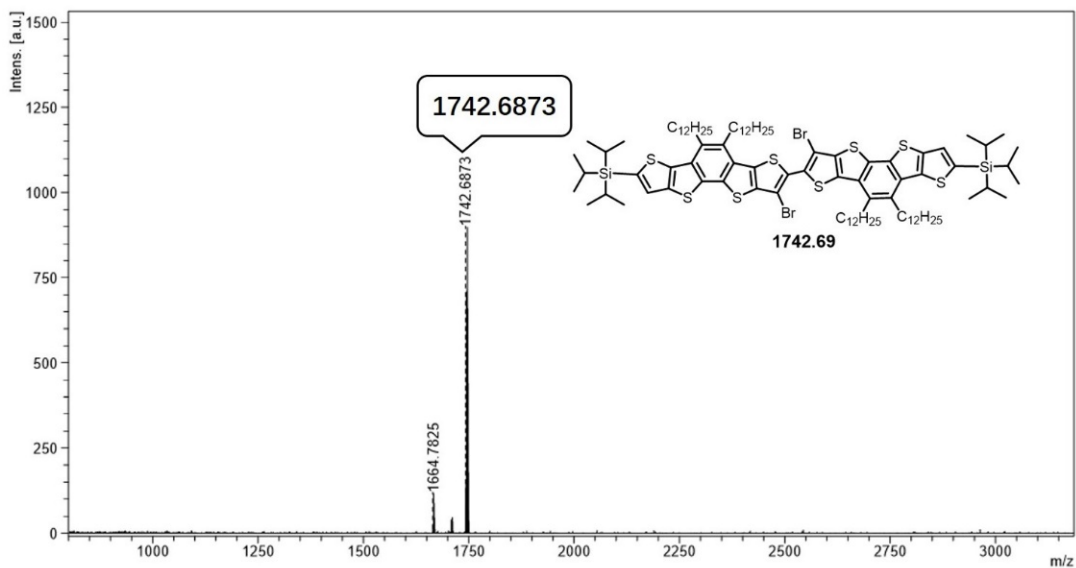

Figure S10. MALDI-TOF MS spectra of compound 3.

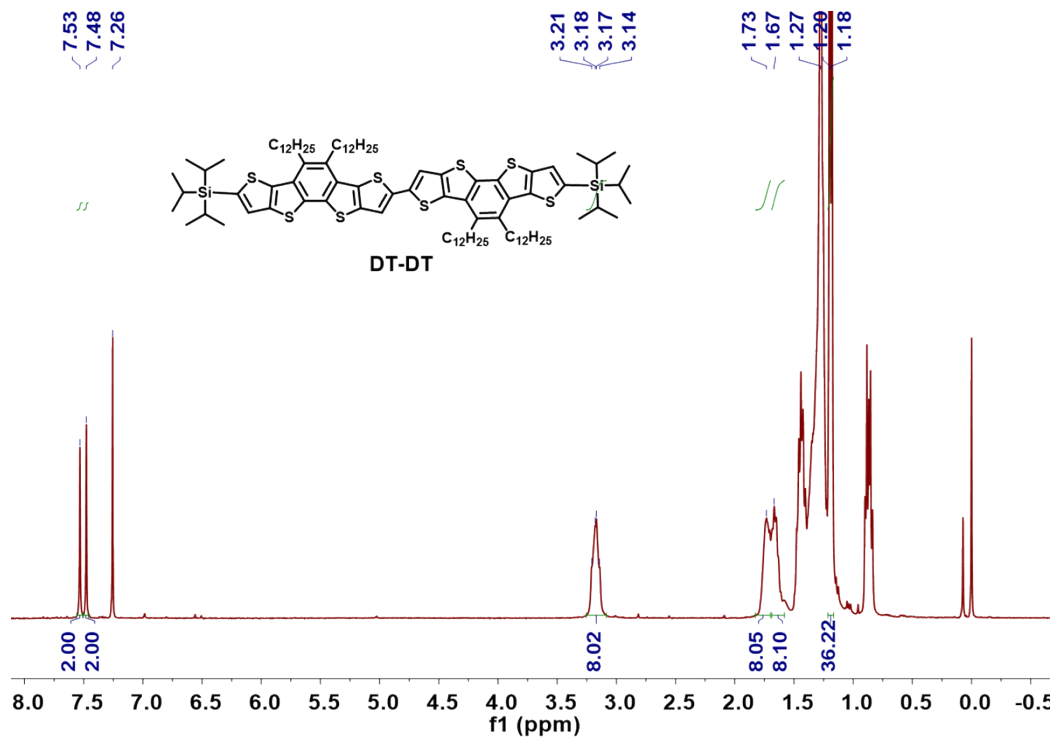

Figure S11. <sup>1</sup>H-NMR spectra of DT-DT. (400 MHz, CDCl<sub>3</sub>, 298K)

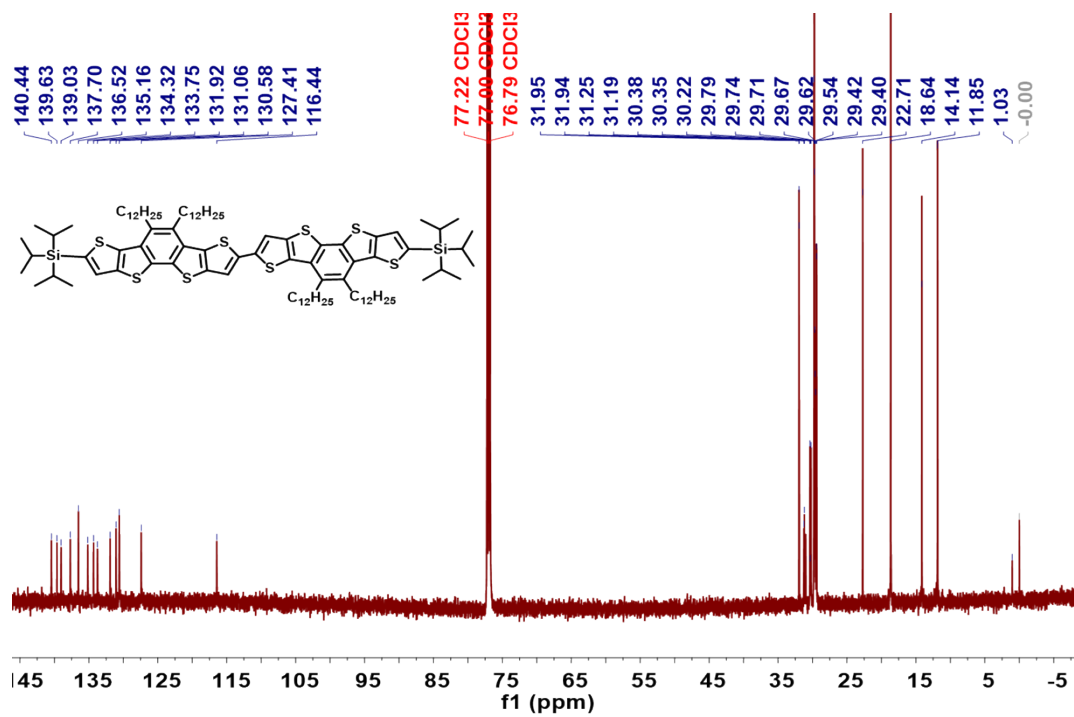

Figure S12. <sup>13</sup>C-NMR spectra of **DT-DT**. (101 MHz, CDCl<sub>3</sub>, 298K)

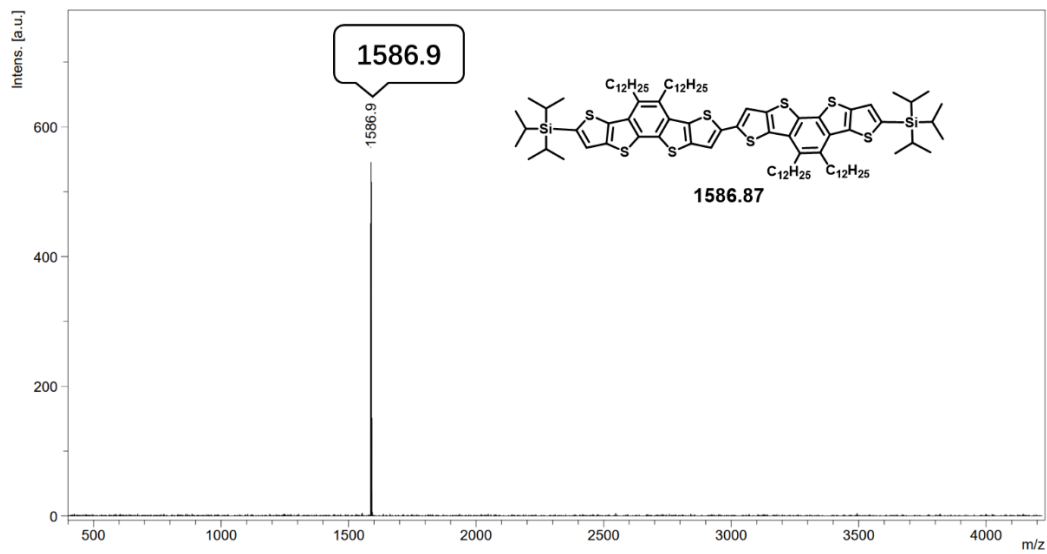

Figure S13. MS spectra of **DT-DT**.

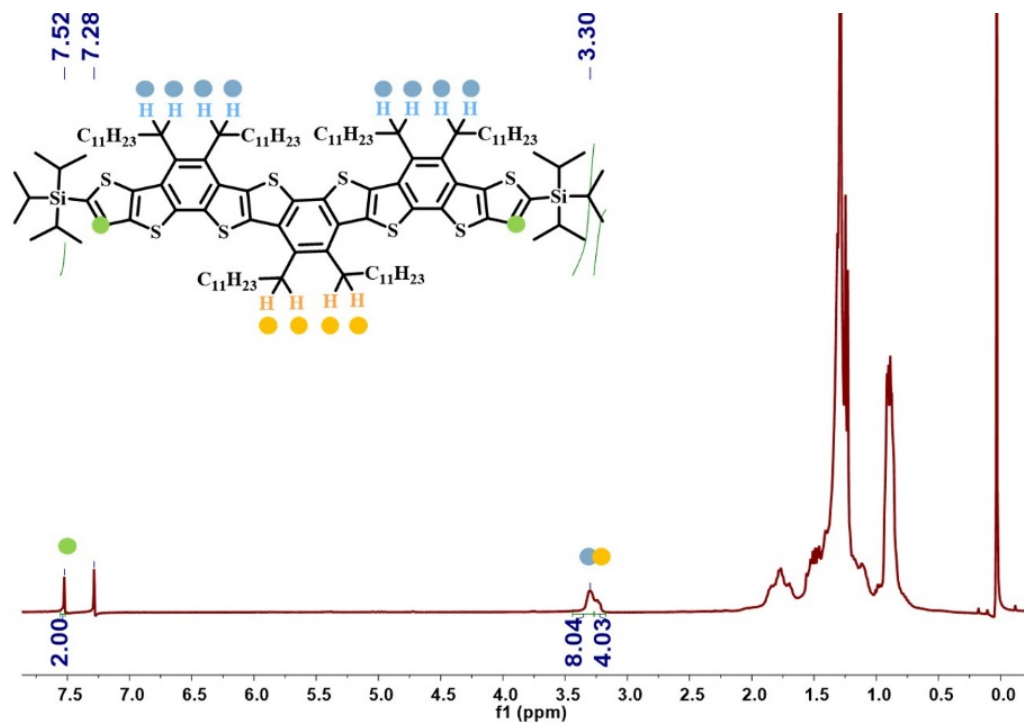

Figure S14. <sup>1</sup>H-NMR spectra of **BBDTB-TIPS**. (400 MHz, CDCl<sub>3</sub>, 298K)

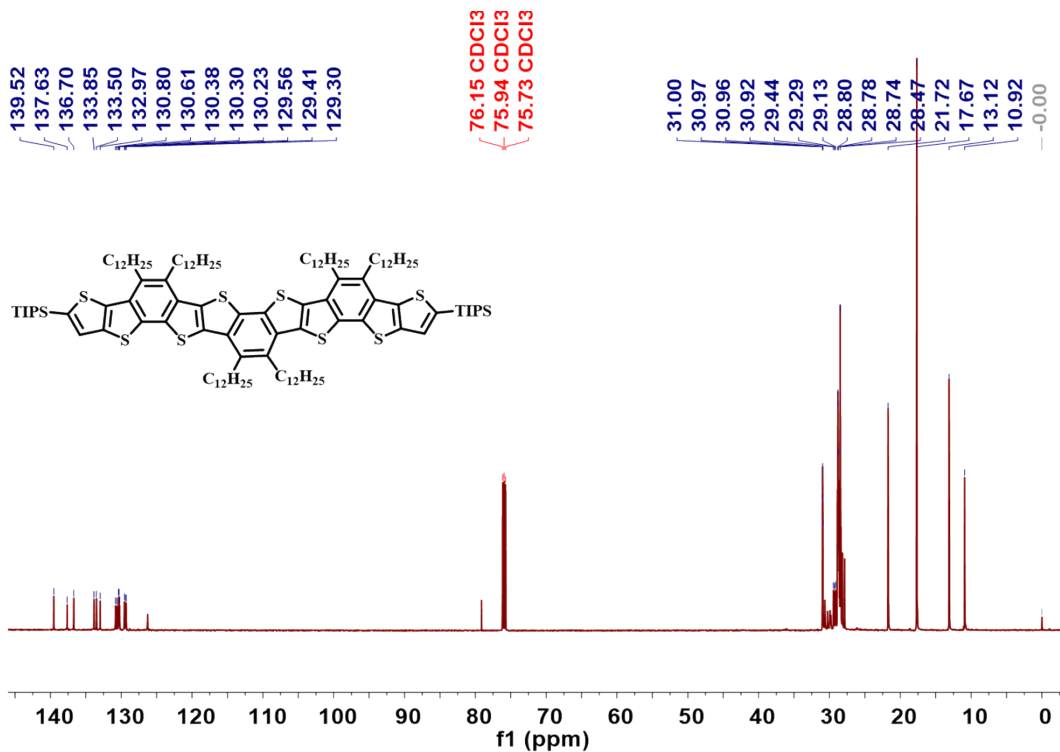

Figure S15. <sup>13</sup>C-NMR spectra of **BBDTB-TIPS**. (151 MHz, CDCl<sub>3</sub>, 298K)

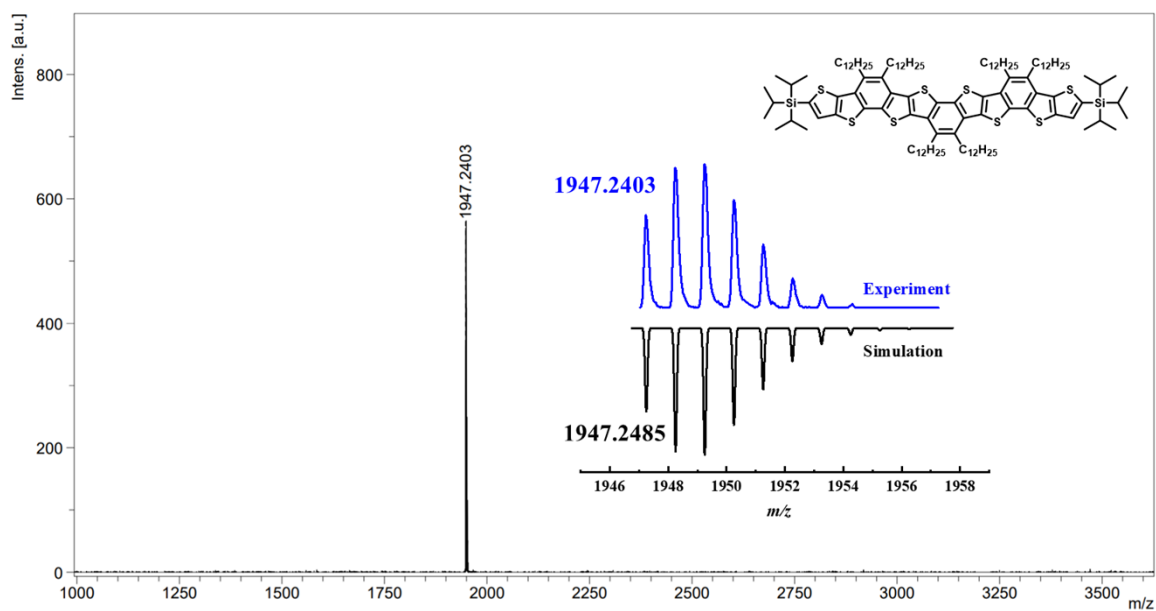

Figure S16. MS spectra of **BBDTB-TIPS**.

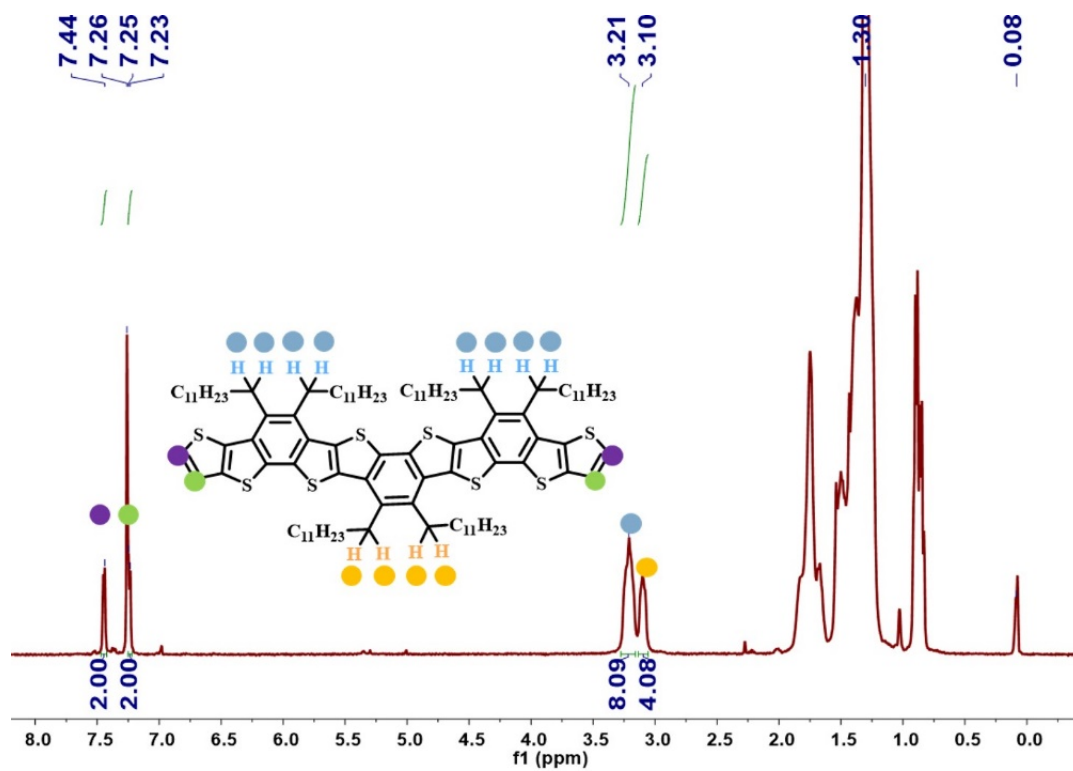

Figure S17.  $^1\text{H-NMR}$  spectra of **BBDTB-H**. (400 MHz,  $\text{CDCl}_3$ , 298K)

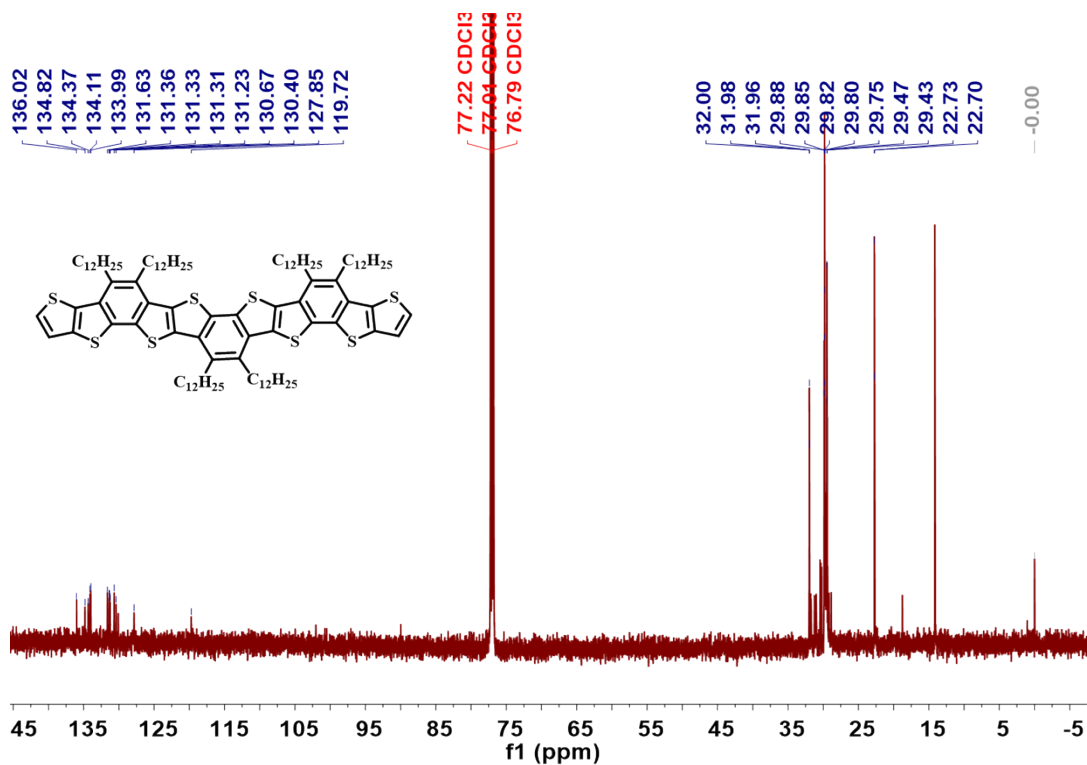

Figure S18.  $^{13}C$ -NMR spectra of **BBDTB-H**. (151 MHz,  $CDCl_3$ , 298K)

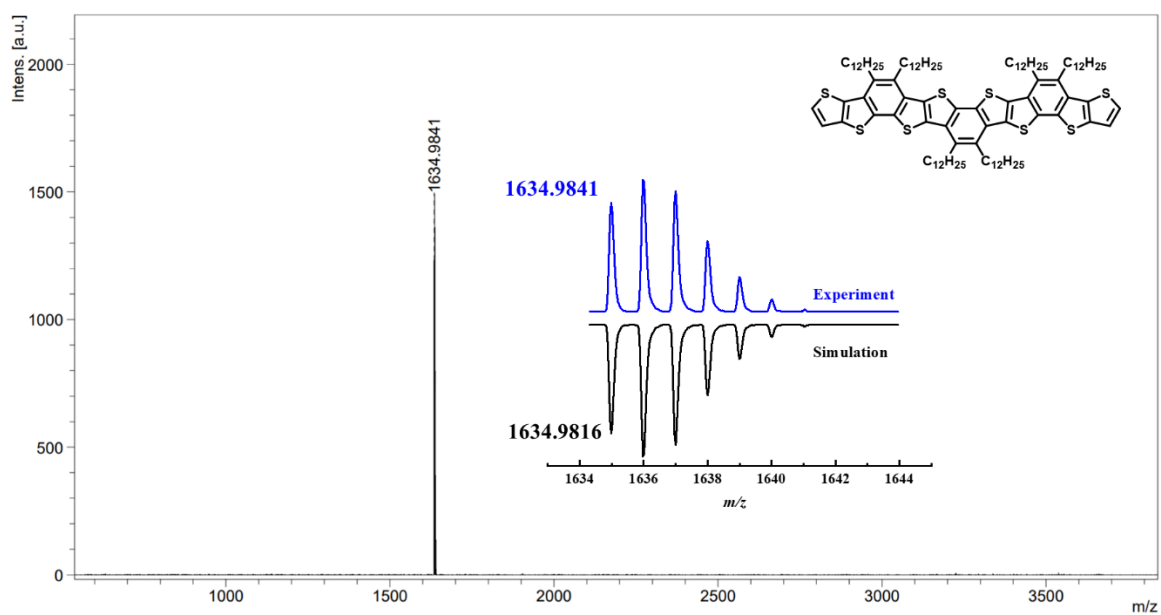

Figure S19. MS spectra of **BBDTB-H**.

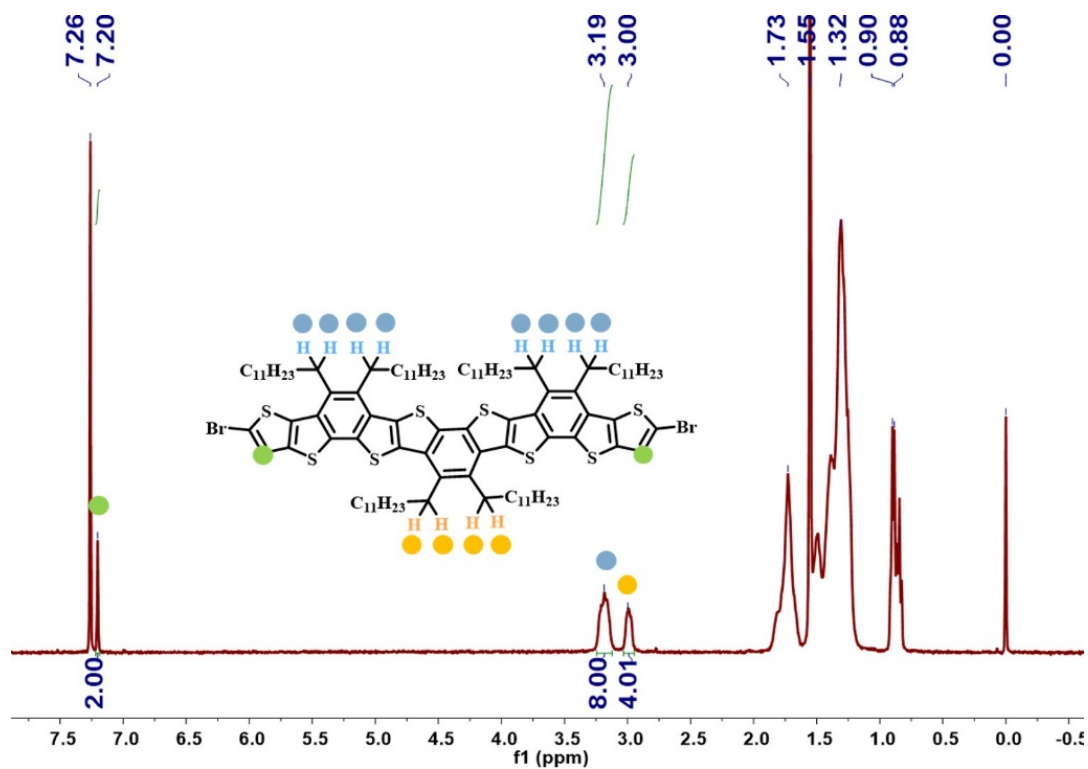

Figure S20.  $^1\text{H-NMR}$  spectra of **BBDTB-Br**. (400 MHz,  $\text{CDCl}_3$ , 298K)

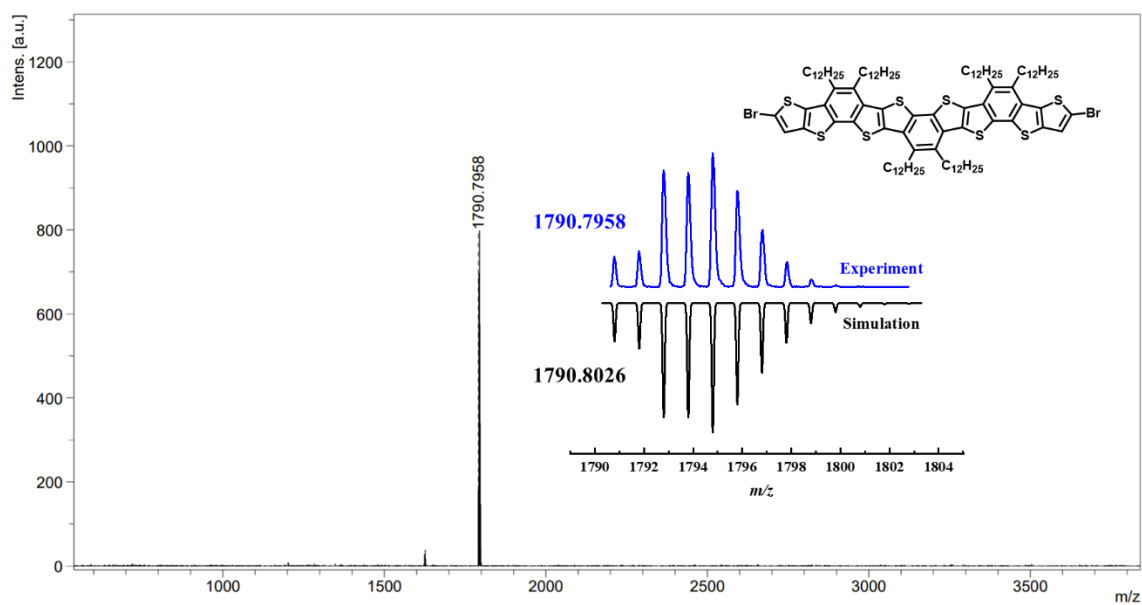

Figure S21. MS spectra of **BBDTB-Br**.



### 3. Optical spectra

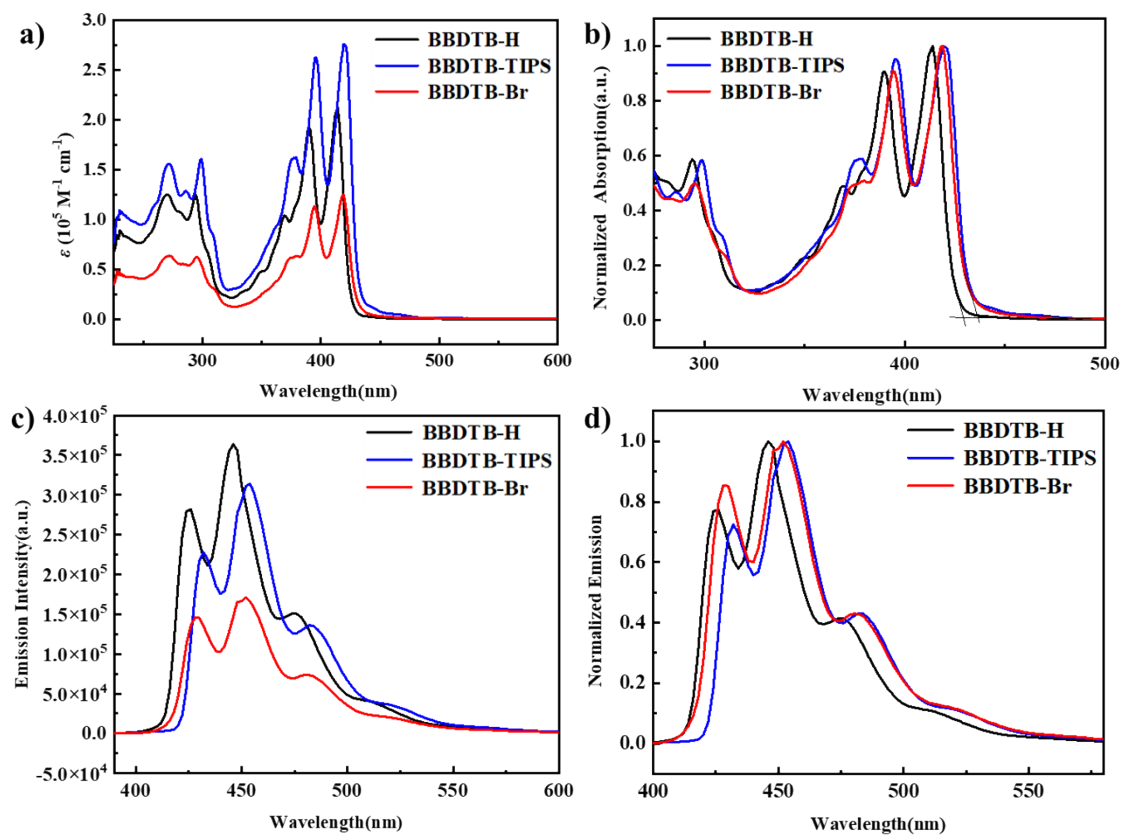

Figure S22. Absorption and emission spectra of **BBDTB-H**, **BBDTB-TIPS** and **BBDTB-Br**.

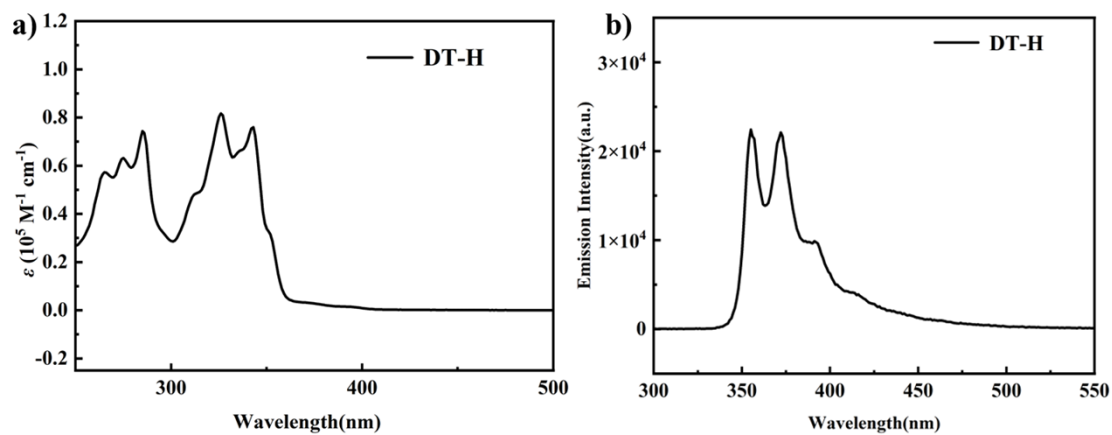

Figure S23. Absorption and emission spectra of **DT-H**.

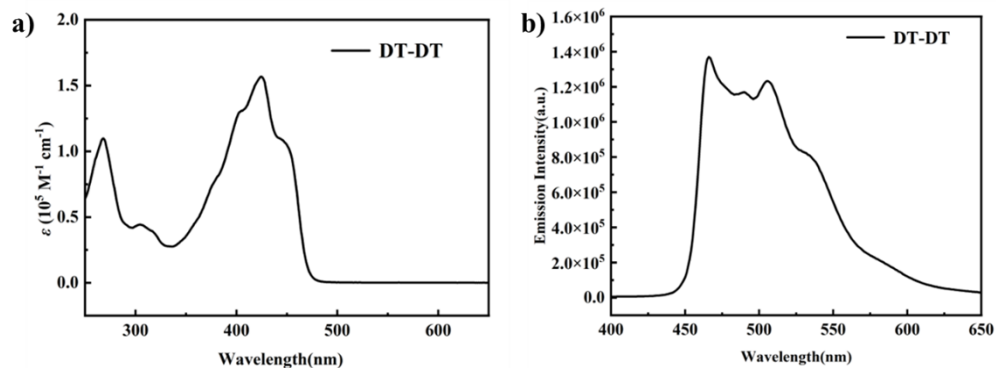

Figure S24. Absorption and emission spectra of DT-DT.

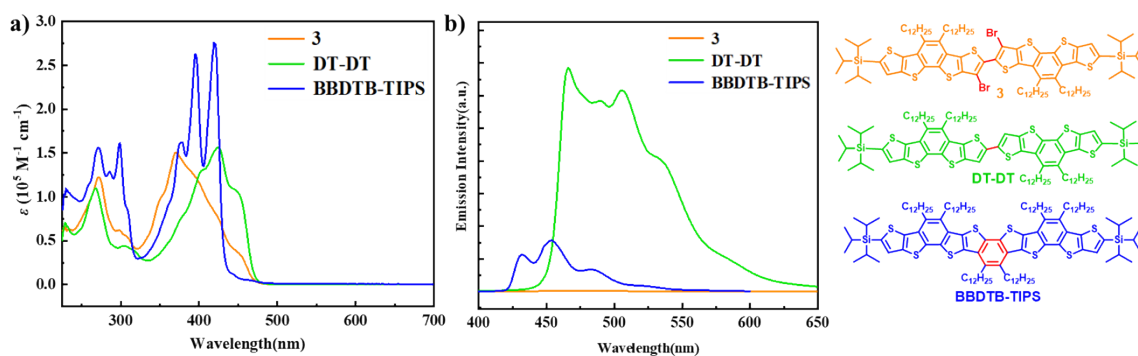

Figure S25 UV-vis absorption spectra and emission spectra of 3, DT-DT and BBDTB-TIPS

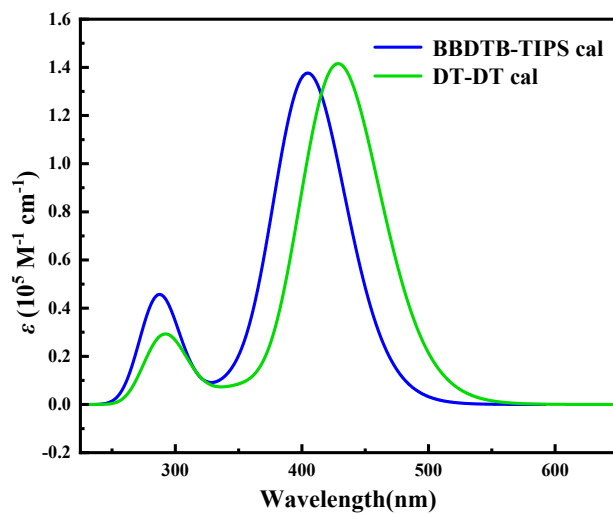

Figure S26. Calculated UV-vis absorption spectra of DT-DT and BBDTB-TIPS.

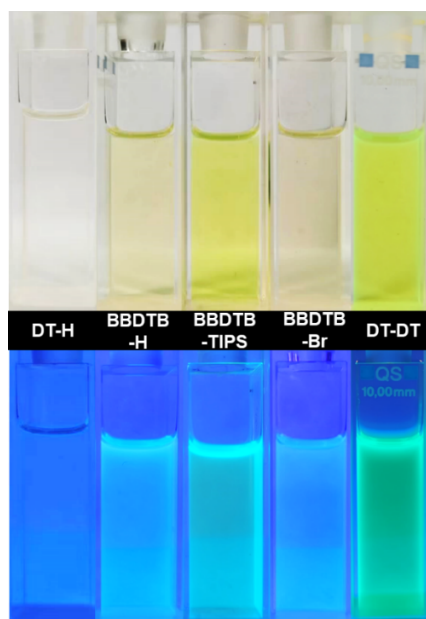

Figure S27. Photographs of **DT-H**, **BBDTB-H**, **BBDTB-TIPS**, **BBDTB-Br** and **DT-DT** in the daylight (top), and under 365 nm UV (bottom) in  $\text{CH}_2\text{Cl}_2$ .

#### 4. DFT Calculation

Table S1 Calculated UV absorption spectroscopy data about DT-DT

|       | $E_g$<br>[eV] | $\lambda_{\text{abs}}$<br>[nm] | $f$    | transition      | coefficient |
|-------|---------------|--------------------------------|--------|-----------------|-------------|
| $S_1$ | 2.8923        | 428.67                         | 2.6235 | HOMO > LUMO     | 0.975       |
| $S_2$ | 3.5037        | 353.87                         | 0.0053 | HOMO-1 > LUMO   | 0.774       |
|       |               |                                |        | HOMO-3 > LUMO   | 0.151       |
| $S_3$ | 3.5227        | 351.96                         | 0.1213 | HOMO-2 > LUMO   | 0.921       |
| $S_4$ | 3.6175        | 342.73                         | 0.0006 | HOMO-3 > LUMO   | 0.781       |
|       |               |                                |        | HOMO-1 > LUMO   | 0.157       |
| $S_5$ | 3.7015        | 334.96                         | 0.0002 | HOMO > LUMO+1   | 0.927       |
| $S_6$ | 4.1084        | 301.78                         | 0.227  | HOMO > LUMO+2   | 0.744       |
|       |               |                                |        | HOMO-3 > LUMO+1 | 0.147       |

|                 |        |        |        |                 |       |
|-----------------|--------|--------|--------|-----------------|-------|
| S <sub>7</sub>  | 4.1771 | 296.82 | 0.0012 | HOMO-2 > LUMO+1 | 0.528 |
|                 |        |        |        | HOMO-5 > LUMO   | 0.253 |
|                 |        |        |        | HOMO-1 > LUMO+2 | 0.057 |
| S <sub>8</sub>  | 4.2001 | 295.19 | 0.062  | HOMO-1 > LUMO+1 | 0.665 |
|                 |        |        |        | HOMO-2 > LUMO+2 | 0.09  |
|                 |        |        |        | HOMO-6 > LUMO   | 0.074 |
|                 |        |        |        | HOMO > LUMO+2   | 0.069 |
| S <sub>9</sub>  | 4.2598 | 291.06 | 0.0026 | HOMO-5 > LUMO   | 0.651 |
|                 |        |        |        | HOMO-2 > LUMO+1 | 0.162 |
|                 |        |        |        | HOMO > LUMO+3   | 0.06  |
| S <sub>10</sub> | 4.2731 | 290.15 | 0.1237 | HOMO-4 > LUMO   | 0.651 |
|                 |        |        |        | HOMO-6 > LUMO   | 0.133 |
|                 |        |        |        | HOMO-3 > LUMO+1 | 0.073 |

Table S2 Calculated UV absorption spectroscopy data about BBDTB-TIPS

|                | $E_g$<br>[eV] | $\lambda_{abs}$<br>[nm] | $f$    | transition      | coefficient |
|----------------|---------------|-------------------------|--------|-----------------|-------------|
| S <sub>1</sub> | 3.0599        | 405.19                  | 2.5245 | HOMO > LUMO     | 0.967       |
| S <sub>2</sub> | 3.4524        | 359.12                  | 0.1436 | HOMO-1 > LUMO   | 0.925       |
| S <sub>3</sub> | 3.6472        | 339.94                  | 0.0459 | HOMO-2 > LUMO   | 0.855       |
|                |               |                         |        | HOMO-1 > LUMO+1 | 0.063       |
| S <sub>4</sub> | 3.6903        | 335.97                  | 0.0049 | HOMO > LUMO+1   | 0.57        |
|                |               |                         |        | HOMO-3 > LUMO   | 0.382       |
| S <sub>5</sub> | 3.7754        | 328.4                   | 0.0129 | HOMO-3 > LUMO   | 0.509       |
|                |               |                         |        | HOMO > LUMO+1   | 0.332       |
|                |               |                         |        | HOMO-4 > LUMO   | 0.07        |
| S <sub>6</sub> | 3.9556        | 313.44                  | 0.009  | HOMO-4 > LUMO   | 0.738       |

|                 |        |        |        |                 |       |
|-----------------|--------|--------|--------|-----------------|-------|
|                 |        |        |        | HOMO-2 > LUMO+1 | 0.065 |
|                 |        |        |        | HOMO > LUMO+1   | 0.061 |
|                 |        |        |        | HOMO-3 > LUMO   | 0.051 |
|                 |        |        |        | HOMO-1 > LUMO+1 | 0.801 |
| S <sub>7</sub>  | 4.0947 | 302.79 | 0.0205 | HOMO-2 > LUMO   | 0.091 |
|                 |        |        |        | HOMO > LUMO+2   | 0.057 |
|                 |        |        |        | HOMO > LUMO+2   | 0.528 |
| S <sub>8</sub>  | 4.2529 | 291.53 | 0.5132 | HOMO-3 > LUMO+1 | 0.3   |
|                 |        |        |        | HOMO-2 > LUMO+1 | 0.622 |
|                 |        |        |        | HOMO > LUMO+3   | 0.104 |
| S <sub>9</sub>  | 4.2807 | 289.64 | 0.006  | HOMO-4 > LUMO   | 0.094 |
|                 |        |        |        | HOMO-1 > LUMO+2 | 0.056 |
| S <sub>10</sub> | 4.2895 | 289.04 | 0.0002 | HOMO > LUMO+4   | 0.885 |

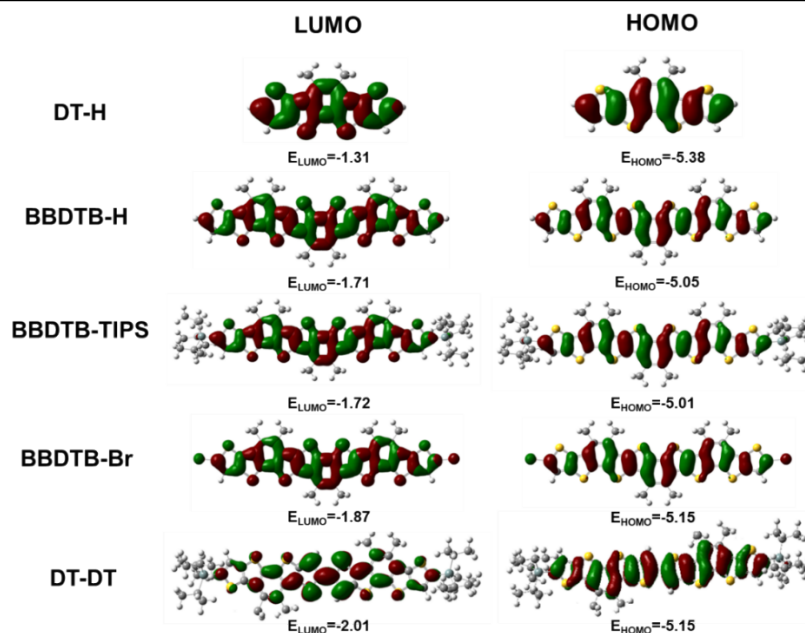

Figure S28. Optimized geometries of **DT-H**, **BBDTB-H**, **BBDTB-TIPS**, **BBDTB-Br**, and **DT-DT** and spatial electron distributions of frontier molecular orbitals (FMOs) and their energy

levels. B3LYP/6-31G(d) (dodecyl side chains are replaced by methyl groups for simplifying DFT calculation)

## 5. CV Curves

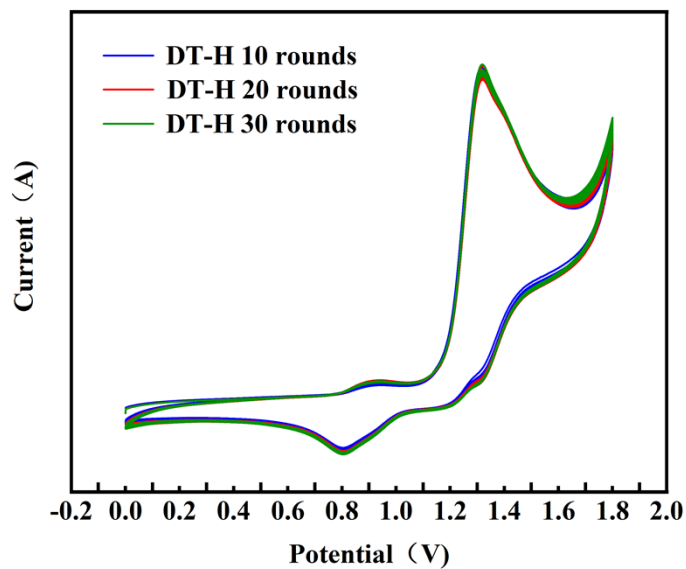

Figure S29. The CV curves of **DT-H** in  $\text{CH}_2\text{Cl}_2$ .

## 6. Thermology Curves

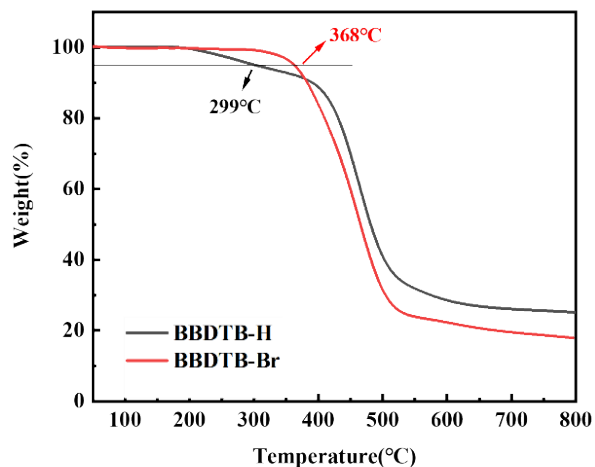

Figure S30. TGA curves of **BBDTB-H** and **BBDTB-Br** measured under  $\text{N}_2$  at  $10\text{ }^\circ\text{C min}^{-1}$ .

## 7. Single crystal structures

Table S3. Single crystal data of **BBDTB-TIPS**

| Compound                                | <b>BBDTB-TIPS</b> CCDC:2204238                                        |
|-----------------------------------------|-----------------------------------------------------------------------|
| Empirical formula                       | C <sub>120</sub> H <sub>194</sub> S <sub>8</sub> Si <sub>2</sub>      |
| Formula weight                          | 1949.4                                                                |
| Crystal system                          | monoclinic                                                            |
| Space group                             | P21/c                                                                 |
| a/Å                                     | 9.0909(12)                                                            |
| b/Å                                     | 46.860(6)                                                             |
| c/Å                                     | 27.679(4)                                                             |
| $\alpha$ /                              | 90                                                                    |
| $\beta$ /                               | 94.973(4)                                                             |
| $\gamma$ /                              | 90                                                                    |
| Volume/Å <sup>3</sup>                   | 11747(3)                                                              |
| Z                                       | 4                                                                     |
| $\mu$ /mm <sup>-1</sup>                 | 1.267                                                                 |
| F(000)                                  | 4280.0                                                                |
| Radiation                               | GaK $\alpha$ ( $\lambda$ = 1.34139)                                   |
| 2 $\Theta$ range for data collection/   | 3.28 to 99.308                                                        |
| Index ranges                            | -4 $\leq$ h $\leq$ 10, -53 $\leq$ k $\leq$ 53, -31 $\leq$ l $\leq$ 29 |
| Reflections collected                   | 73012                                                                 |
| Independent reflections                 | 17805                                                                 |
| Data/restraints/parameters              | 17805/639/1250                                                        |
| Goodness-of-fit on F <sup>2</sup>       | 1.132                                                                 |
| Final R indexes [ $I \geq 2\sigma(I)$ ] | R <sub>1</sub> = 0.0860, wR <sub>2</sub> = 0.2588                     |

Final R indexes [all data]

$R_1 = 0.1069$ ,  $wR_2 = 0.2849$

Largest diff. peak/hole /  $e \text{ \AA}^{-3}$

0.84/-0.59

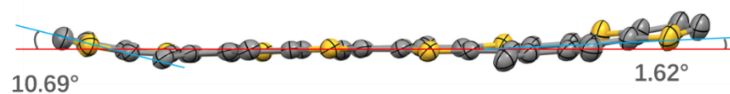

Figure S31. The side view single crystal structure of the **BBDTB** skeleton.

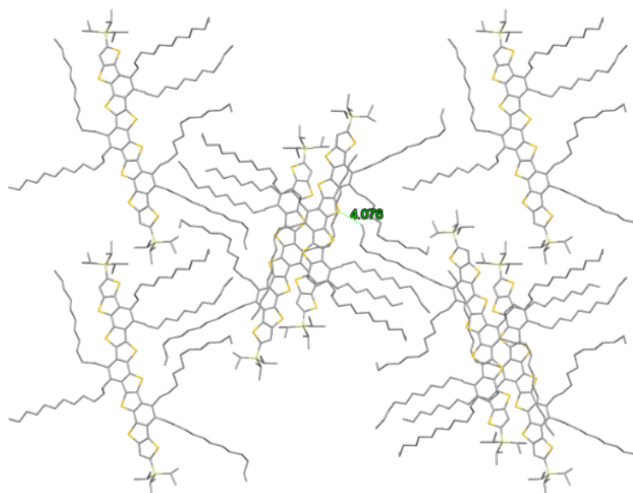

Figure S32. The packing arrangement of **BBDTB-TIPS** along the a-axis. S-C distance is 4.076Å.

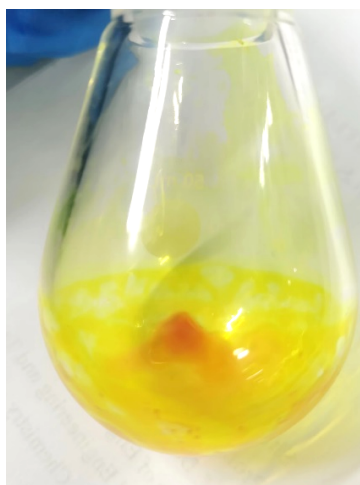

Figure S33. BBDTB-TIPS at the ambient state in rt.



## 8. OFET Characteristics

Table S4. OFET Characteristics of the **BBDTB-H**

| Compound | Substrate | T <sub>a</sub> /°C | $\mu_{h,ave}^a /$<br>cm <sup>2</sup> V <sup>-1</sup> S <sup>-1</sup> | $\mu_{h,max}^a /$<br>cm <sup>2</sup> V <sup>-1</sup> S <sup>-1</sup> | V <sub>th</sub> /V | I <sub>on</sub> /I <sub>off</sub> |
|----------|-----------|--------------------|----------------------------------------------------------------------|----------------------------------------------------------------------|--------------------|-----------------------------------|
| BBDTB-H  | OTMS      | 25                 | 0.0113                                                               | 0.0175                                                               | -25±1              | 10 <sup>6</sup> ~10 <sup>7</sup>  |
|          |           | 100                | 0.0221                                                               | 0.0285                                                               | -32±1              | 10 <sup>7</sup>                   |

<sup>a</sup> Determined from the following equation in the saturation region;  $I_{DS} = (W/2L) C_i \mu (V_{GS} - V_{th})^2$ .

1 S. Liu, W. Cao, D. Xia, J. Zhang, J. Fan, C. An, R. Fan, S. Hao, K. Lin and Y. Yang, *Dyes and Pigments*, 2021, **193**, 109506.
